# Supplementary material
Source: PubMed Central journal article supplement (PMC7239117)
Supplement: kqaa085_suppl_annex_supplementary.pdf [file kqaa085_suppl_annex_supplementary.pdf]

**Annex 1: Questions**

In the current pandemic do either you or your OH department/organisation:

Q1. Offer out of hours or weekend services? Yes/No

Q2. Employ extra staff to manage the workload of your department? Yes/No

Q3. Change your pattern of work e.g. rota system? Yes/No

Q4. Receive any voluntary help to manage the workload of your department?  
Yes/No

Q5. Offer any routine services such as management referrals (F2F) or telephone consultations? Yes/No

Q6. Offer emergency clinic access to employees for conditions such as a needle stick injury, occupational dermatitis etc? Yes/No

Q7. Offer vaccination service? Yes/No

Q8. Have a dedicated telephone line for COVID queries? Yes/No

Q9. Have a dedicated email inbox for COVID queries? Yes/No

Q10. You are based in: England, Scotland, Wales or Northern Ireland
